# Supplementary material for: The Utstein template for uniform reporting of data following major trauma: A joint revision by SCANTEM, TARN, DGU-TR and RITG
Source: PubMed Central journal article supplement (PMC2568949; doi:10.1186/1757-7241-16-7), 2008-08-28
Supplement: 1757-7241-16-7-S1.pdf [file 1757-7241-16-7-S1.pdf]

## Letter of Consent

From April to December 2007, selected representatives from different trauma organisations and networks in Europe participated in a modified nominal group technique process, which included two consensus-meetings at the Utstein Abbey in Norway. The mission was to agree on a European standard of inclusion and exclusion criteria and a minimal core dataset, for documenting and reporting data following major trauma. A consensus was reached, and with this letter, we, the participants of the Utstein consensus process hereby confirm that we will implement the inclusion/exclusion criteria and the core data points agreed upon.

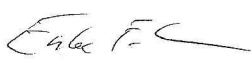  
Erika F. Christensen  
Emergency Medical  
Services  
Central Denmark Region

  
Per Örténwall  
KVITTRA

  
Nils Oddvar Skaga  
Trauma registry  
Ullevål University Hospital

  
Lena Klarin  
KVITTRA

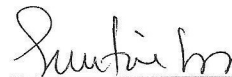  
Ernestina Gomes  
Hospital Geral de Santo  
António, Porto

  
Merian Schultz-Larsen  
Trauma registry  
Odense University Hospital

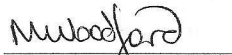  
Maralyn Woodford  
Trauma Audit & Research  
Network

  
Morten Hestnes  
Trauma Registry  
Ullevål University  
Hospital

  
Antoinette Edwards  
Trauma Audit & Research  
Network

  
Timothy J. Coats  
Trauma Audit & Research  
Network

  
Olav Røise  
Ullevål University  
Hospital

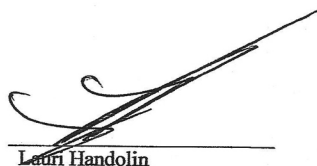  
Lauri Handolin  
Töölö Hospital Trauma  
Registry,  
Helsinki University Hospital

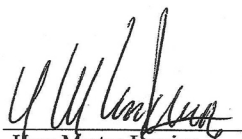  
Hans Morten Lossius  
Stavanger University  
Hospital &  
Norwegian Air Ambulance

  
Kjetil G. Ringdal  
Norwegian Air  
Ambulance &  
Ullevål University  
Hospital

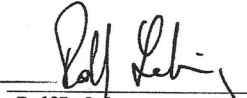  
Rolf Lefering  
Trauma Registry of the  
German Society of Trauma  
Surgery

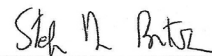  
Stefano Di Bartolomeo  
University of Udine,  
Udine, Italy

  
Maaret Castrén  
Södersjukhuset,  
Karolinska Institutet

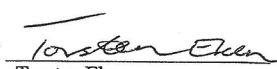  
Torsten Eken  
Aker University Hospital

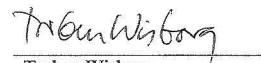  
Torben Wisborg  
Hammerfest Hospital

  
Ari Leppänen  
Meilahti Hospital  
Helsinki University  
Hospital
